# Supplementary material for: Complex molecular profile of DNA repair genes in epithelial ovarian carcinoma patients with different sensitivity to platinum-based therapy
Source: PubMed Central journal article supplement (PMC9755737; doi:10.3389/fonc.2022.1016958), 2022-12-02
Supplement: DataSheet_1.pdf [file DataSheet_1.pdf]

## ***Supplementary Material***

*to*

### ***Complex molecular profile of DNA repair genes in epithelial ovarian carcinoma patient's with different sensitivity to platinum-based therapy***

#### **1 Supplementary Data**

**Table S1.** Detailed clinical characteristics of OC patients from the TCGA database selected for the present study.

**Table S2.** Selection of 178 DNA repair genes for study.

**Table S3.** Probe coverage in the EPIC array for DNA repair genes followed in our study.

**Table S4.** Differential methylation analysis results. Results from differential methylation analysis at cg probe level.

**Table S5.** Differentially methylated genes and gene regions (TSS200, TSS1500, or promoter).

**Table S6.** Results of significant differences in DNA repair gene expression stratified by the presence of somatic mutations.

**Table S7.** Overview of significant potentially impactful somatic mutations in DNA repair genes.

**Table S8.** Associations of somatic mutations in DNA repair genes with *RBBP8* methylation.

**Table S9.** Top correlated DNA repair gene expression ( $P < 0.01$ ) with methylation profile.

**Figure S1.** Differentially expressed gene *DUT* (deoxyuridine triphosphatase) stratified by the presence of peritoneal metastases (pM).

**Figure S2.** Differential *FAAP20* expression analysis stratified by the presence of somatic mutations in *PRKDC* and platinum-resistance status in the TCGA dataset.

**Figure S3.** Kaplan-Meier plots of overall survival for (A) *XPC* and (B) *PRKDC* somatic mutations.

**Figure S4.** Kaplan-Meier plots of overall survival for (A) *BRCA1-RAD9A-RAD50* and (B) *XPC-PRKDC-FAAP20* combinations.

## 2 Supplementary Tables

### Patient's characteristics from the TCGA database

We have selected patients from TCGA database based on characteristics of our dataset. The main criteria were adjuvant chemotherapy regimens corresponding to our patients set and information about response to the therapy. We used expression data from RNA sequencing expression profiling of 168 patients (N=168) and methylation microarrays for 232 patients (N=232).

The mean of patients' age at diagnosis was 59.5 years for both cohorts. All patients' tumor samples were histologically classified as Serous Cystadenocarcinoma (100 %) at stage III (77.9 %) and grade 3 (86.2 %) for all patients. Chemotherapy regimens combined mostly paclitaxel with carboplatin (88.3 %) or paclitaxel with cisplatin (6.3 %). The rest of the regimens combined paclitaxel with carboplatin and cisplatin (1.1 %) or involved platinum monotherapy (4.5 %). Platinum-free interval (PFI) was calculated from day of last dose of chemotherapy to the day of the relapse/death or the last follow up in remission. Based on PFI interval we classified patients as platinum-resistant (18.8 %) and platinum-sensitive ones (81.2 %). The mean PFI for platinum-sensitive patients was ~ 1313 - 1330 days and for platinum-resistant patients ~ 161.5 days.

**Table S1.** Detailed clinical characteristics of OC patients from the TCGA database selected for the present study.

| Characteristics               | Expression profile | Methylation profile |
|-------------------------------|--------------------|---------------------|
|                               | N (%)              | N (%)               |
| <b>Number of patients</b>     | <b>168</b>         | <b>232</b>          |
| <b>Age</b> (mean ± SD, years) | 59.8 ± 11.25       | 59.8 ± 11.58        |
| <b>Stage</b>                  |                    |                     |
| I                             | 0 (0)              | 3 (1.3)             |
| II                            | 9 (5.4)            | 14 (6)              |
| III                           | 132 (78.6)         | 179 (77.2)          |
| IV                            | 27 (16)            | 36 (15.5)           |
| <b>OC type</b>                |                    |                     |
| Serous Cystadenoma            | 168 (100)          | 232 (100)           |
| <b>Histological Grade</b>     |                    |                     |
| G1                            | 0 (0)              | 1 (0.4)             |
| G2                            | 18 (10.7)          | 23 (9.9)            |
| G3                            | 145 (86.3)         | 201 (86.6)          |
| G4                            | 1 (0.6)            | 5 (2.7)             |
| GX                            | 3 (1.8)            | 1 (0.4)             |
| Not available                 | 1 (0.6)            | 1 (0.6)             |

|                                                         |                |                |
|---------------------------------------------------------|----------------|----------------|
| <b>Residuum after surgery</b>                           |                |                |
| No Macroscopic Disease                                  | 29 (17.3)      | 49 (21.1)      |
| > 20mm                                                  | 40 (23.8)      | 51 (21.9)      |
| 11-20mm                                                 | 13 (7.7)       | 16 (6.9)       |
| 1-10mm                                                  | 80 (44.7)      | 99 (42.7)      |
| Not available                                           | 11 (6.5)       | 17 (7.4)       |
| <b>Regimen of chemotherapy</b>                          |                |                |
| Paclitaxel with carboplatin                             | 148 (88.1)     | 205 (88.4)     |
| Paclitaxel with carboplatin and cisplatin               | 2 (1.2)        | 2 (0.9)        |
| Paclitaxel with cisplatin                               | 11 (6.5)       | 14 (6)         |
| Platinum monotherapy                                    | 7 (4.2)        | 11 (4.7)       |
| <b>Platinum resistance status</b>                       |                |                |
| Platinum-sensitive                                      | 137 (81.5)     | 188 (81)       |
| Platinum-resistant                                      | 31 (18.5)      | 44 (19)        |
| <b>Treatment outcome first course - TCGA definition</b> |                |                |
| Partial Remission/Response                              | 20 (12)        | 25 (10.8)      |
| Progressive Disease                                     | 14 (8.3)       | 22 (9.5)       |
| Complete Remission/Response                             | 95 (56.5)      | 126 (54.3)     |
| Stable Disease                                          | 6 (3.6)        | 7 (3)          |
| Not available                                           | 33 (19.6)      | 52 (22.4)      |
| <b>Platinum-free interval (PFI)</b>                     |                |                |
| All patients (mean ± SD; days)                          | 1114 ± 851.5   | 1094.5 ± 845.4 |
| Sensitive patients (mean ± SD; days)                    | 1329.5 ± 796.4 | 1313 ± 803.9   |
| Resistant patients (mean ± SD; days)                    | 162 ± 122.8    | 160.8 ± 119    |

Footnotes:

SD (standard deviation)

**Table S2.** Selection of 178 DNA repair genes for study. DNA repair genes covering the whole DNA repair system. Selection of these genes was based on [58–60].

| <b>Gene<br/>Official<br/>Symbol</b> | <b>Alternative Names</b>                                                   | <b>Official Full Name</b>                                 |
|-------------------------------------|----------------------------------------------------------------------------|-----------------------------------------------------------|
| <i>ALKBH2</i>                       | <i>ABH2</i>                                                                | alkB homolog 2, alpha-ketoglutarate dependent dioxygenase |
| <i>ALKBH3</i>                       | <i>ABH3, PCA1, DEPC1, hABH3, DEPC-1</i>                                    | alkB homolog 3, alpha-ketoglutarate dependent dioxygenase |
| <i>APEX1</i>                        | <i>APE, APX, APE1, APEN, APEX, HAP1, REF1</i>                              | apurinic/apyrimidinic endodeoxyribonuclease 1             |
| <i>APEX2</i>                        | <i>APE2, XTH2, ZGRF2, APEXL2</i>                                           | apurinic/apyrimidinic endodeoxyribonuclease 2             |
| <i>APLF</i>                         | <i>APFL, PALF, Xip1, ZCCHH1, C2orf13</i>                                   | aprataxin and PNKP like factor                            |
| <i>APTX</i>                         | <i>AOA, AOA1, AXA1, EAOH, EOAHA, FHA-HIT</i>                               | aprataxin                                                 |
| <i>ATM</i>                          | <i>AT1, ATA, ATC, ATD, ATE, ATDC, TEL1, TELO1</i>                          | ATM serine/threonine kinase                               |
| <i>ATR</i>                          | <i>FRP1, MEC1, SCKL, FCTCS, SCKL1</i>                                      | ATR serine/threonine kinase                               |
| <i>ATRIP</i>                        |                                                                            | ATR interacting protein                                   |
| <i>BLM</i>                          | <i>BS, RECQ2, RECQL2, RECQL3, MGRISCE1</i>                                 | BLM RecQ like helicase                                    |
| <i>BRCA1</i>                        | <i>IRIS, PSCP, BRCA1, BRCC1, FANCS, PNCA4, RNF53, BROVCA1, PPP1R53</i>     | BRCA1 DNA repair associated                               |
| <i>BRCA2</i>                        | <i>FAD, FACD, FAD1, GLM3, BRCC2, FANCD, PNCA2, FANCD1, XRCC11, BROVCA2</i> | BRCA2 DNA repair associated                               |
| <i>BRIP1</i>                        | <i>OF, BACH1, FANCF</i>                                                    | BRCA1 interacting helicase 1                              |
| <i>SLX4</i>                         | <i>FANCP, BTBD12, MUS312</i>                                               | SLX4 structure-specific endonuclease subunit              |
| <i>CCNH</i>                         | <i>CAK, p34, p37, CycH</i>                                                 | cyclin H                                                  |
| <i>CDK7</i>                         | <i>CAK, CAK1, HCAK, MO15, STK1, CDKN7, p39MO15</i>                         | cyclin dependent kinase 7                                 |
| <i>CETN2</i>                        | <i>CALT, CEN2</i>                                                          | centrin 2                                                 |
| <i>CLK2</i>                         |                                                                            | CDC like kinase 2                                         |
| <i>DCLRE1A</i>                      | <i>PSO2, SNM1, SNM1A</i>                                                   | DNA cross-link repair 1A                                  |
| <i>DCLRE1B</i>                      | <i>SNM1B, SNM1B, APOLLO</i>                                                | DNA cross-link repair 1B                                  |
| <i>DCLRE1C</i>                      | <i>SCIDA, SNM1C, A-SCID, RS-SCID, DCLREC1C</i>                             | DNA cross-link repair 1C                                  |
| <i>DDB1</i>                         | <i>XPE, DDBA, XAP1, XPCE, XPE-BF, UV-DDB1</i>                              | damage specific DNA binding protein 1                     |
| <i>DDB2</i>                         | <i>XPE, DDBB, UV-DDB2</i>                                                  | damage specific DNA binding protein 2                     |
| <i>DMC1</i>                         | <i>DMC1H, LIM15, dJ199H16.1</i>                                            | DNA meiotic recombinase 1                                 |

|               |                                                                      |                                                              |
|---------------|----------------------------------------------------------------------|--------------------------------------------------------------|
| <i>DUT</i>    | <i>dUTPase</i>                                                       | deoxyuridine triphosphatase                                  |
| <i>EME1</i>   | <i>MMS4L, SLX2A</i>                                                  | essential meiotic structure-specific endonuclease 1          |
| <i>EME2</i>   | <i>SLX2B, gs125</i>                                                  | essential meiotic structure-specific endonuclease subunit 2  |
| <i>ENDOV</i>  |                                                                      | endonuclease V                                               |
| <i>ERCC1</i>  | <i>UV20, COFS4, RAD10</i>                                            | ERCC excision repair 1, endonuclease non-catalytic subunit   |
| <i>ERCC2</i>  | <i>EM9, TTD, XPD, TTD1, COFS2, TFIIH</i>                             | ERCC excision repair 2, TFIIH core complex helicase subunit  |
| <i>ERCC3</i>  | <i>XPB, BTF2, Ssl2, TTD2, GTF2H, RAD25, TFIIH</i>                    | ERCC excision repair 3, TFIIH core complex helicase subunit  |
| <i>ERCC4</i>  | <i>XPF, RAD1, FANCO, XFEPS, ERCC11</i>                               | ERCC excision repair 4, endonuclease catalytic subunit       |
| <i>ERCC5</i>  | <i>XPG, UVDR, XPGC, COFS3, ERCM2, ERCC5-201</i>                      | ERCC excision repair 5, endonuclease                         |
| <i>ERCC6</i>  | <i>CSB, CKN2, COFS, ARMD5, COFS1, POF11, RAD26, UVSS1, CSB-PGBD3</i> | ERCC excision repair 6, chromatin remodeling factor          |
| <i>ERCC8</i>  | <i>CSA, CKN1, UVSS2</i>                                              | ERCC excision repair 8, CSA ubiquitin ligase complex subunit |
| <i>EXO1</i>   | <i>HEX1, hExo1</i>                                                   | exonuclease 1                                                |
| <i>FAAP20</i> | <i>FP7162, C1orf86</i>                                               | FA core complex associated protein 20                        |
| <i>FAAP24</i> | <i>C19orf40</i>                                                      | FA core complex associated protein 24                        |
| <i>FAN1</i>   | <i>KMIN, hFAN1, MTMR15, KIAA1018</i>                                 | FANCD2 and FANCI associated nuclease 1                       |
| <i>FANCA</i>  | <i>FA, FAI, FAA, FAH, FA-H, FACA, FANCH</i>                          | FA complementation group A                                   |
| <i>FANCB</i>  | <i>FA2, FAB, FACB, FAAP90, FAAP95</i>                                | FA complementation group B                                   |
| <i>FANCC</i>  | <i>FA3, FAC, FACC</i>                                                | FA complementation group C                                   |
| <i>FANCD2</i> | <i>FA4, FAD, FACD, FAD2, FA-D2, FANCD</i>                            | FA complementation group D2                                  |
| <i>FANCE</i>  | <i>FAE, FACE</i>                                                     | FA complementation group E                                   |
| <i>FANCF</i>  | <i>FAF</i>                                                           | FA complementation group F                                   |
| <i>FANCG</i>  | <i>FAG, XRCC9</i>                                                    | FA complementation group G                                   |
| <i>FANCI</i>  | <i>KIAA1794</i>                                                      | FA complementation group I                                   |
| <i>FANCL</i>  | <i>POG, PHF9, FAAP43</i>                                             | FA complementation group L                                   |
| <i>FANCM</i>  | <i>POF15, SPGF28, FAAP250, KIAA1596</i>                              | FA complementation group M                                   |
| <i>FEN1</i>   | <i>MF1, RAD2, FEN-1</i>                                              | flap structure-specific endonuclease 1                       |
| <i>GEN1</i>   | <i>Gen</i>                                                           | GEN1 Holliday junction 5' flap endonuclease                  |

|               |                                                                         |                                                         |
|---------------|-------------------------------------------------------------------------|---------------------------------------------------------|
| <i>SLX1A</i>  | <i>GIYD1</i>                                                            | SLX1 homolog A, structure-specific endonuclease subunit |
| <i>SLX1B</i>  | <i>GIYD2</i>                                                            | SLX1 homolog B, structure-specific endonuclease subunit |
| <i>GTF2H1</i> | <i>P62, BTF2, TFB1, TFIIH</i>                                           | general transcription factor IIH subunit 1              |
| <i>GTF2H2</i> | <i>p44, BTF2, TFIIH, BTF2P44, T-BTF2P44</i>                             | general transcription factor IIH subunit 2              |
| <i>GTF2H3</i> | <i>P34, BTF2, TFB4, TFIIH</i>                                           | general transcription factor IIH subunit 3              |
| <i>GTF2H4</i> | <i>P52, TFB2, TFIIH</i>                                                 | general transcription factor IIH subunit 4              |
| <i>GTF2H5</i> | <i>TTD, TFB5, TTD3, TTDA, TFIIH, TTD-A, TGF2H5, C6orf175, bA120J8.2</i> | general transcription factor IIH subunit 5              |
| <i>H2AX</i>   | <i>H2A.X, H2A/X, H2AFX</i>                                              | H2A.X variant histone                                   |
| <i>HELQ</i>   | <i>HEL308</i>                                                           | helicase, POLQ like                                     |
| <i>HLTF</i>   | <i>ZBU1, HLTF1, RNF80, HIP116, SNF2L3, HIP116A, SMARCA3</i>             | helicase like transcription factor                      |
| <i>HUS1</i>   | <i>hHUS1</i>                                                            | HUS1 checkpoint clamp component                         |
| <i>CHAF1A</i> | <i>CAF1, P150, CAF-1, CAF1B, CAF1P150</i>                               | chromatin assembly factor 1 subunit A                   |
| <i>CHEK1</i>  | <i>CHK1</i>                                                             | checkpoint kinase 1                                     |
| <i>CHEK2</i>  | <i>CHK2</i>                                                             | checkpoint kinase 2                                     |
| <i>LIG1</i>   |                                                                         | DNA ligase 1                                            |
| <i>LIG3</i>   | <i>LIG2, LIG3alpha</i>                                                  | DNA ligase 3                                            |
| <i>LIG4</i>   | <i>LIG4S</i>                                                            | DNA ligase 4                                            |
| <i>MAD2L2</i> | <i>REV7, FANCV, MAD2B, POLZ2</i>                                        | mitotic arrest deficient 2 like 2                       |
| <i>MBD4</i>   | <i>MED1</i>                                                             | methyl-CpG binding domain 4, DNA glycosylase            |
| <i>MDC1</i>   | <i>NFBD1</i>                                                            | mediator of DNA damage checkpoint 1                     |
| <i>MGMT</i>   |                                                                         | O-6-methylguanine-DNA methyltransferase                 |
| <i>MLH1</i>   | <i>FCC2, COCA2, HNPCC, hMLH1, HNPCC2, MMRC51</i>                        | mutL homolog 1                                          |
| <i>MLH3</i>   | <i>HNPCC7</i>                                                           | mutL homolog 3                                          |
| <i>MMS19</i>  | <i>CIAO4, MET18, MMS19L, hMMS19</i>                                     | MMS19 homolog, cytosolic iron-sulfur assembly component |
| <i>MNAT1</i>  | <i>MAT1, TFB3, CAP35, RNF66</i>                                         | MNAT1 component of CDK activating kinase                |

|               |                                                                    |                                                               |
|---------------|--------------------------------------------------------------------|---------------------------------------------------------------|
| <i>MPG</i>    | <i>AAG, MDG, ADPG, APNG, Mid1, anpg, PIG11, PIG16, CRA36.1</i>     | N-methylpurine DNA glycosylase                                |
| <i>MRE11</i>  | <i>ATLD, HNGS1, MRE11A, MRE11B</i>                                 | MRE11 homolog, double strand break repair nuclease            |
| <i>MSH2</i>   | <i>FCC1, COCA1, HNPCC, LCFS2, hMSH2, HNPCC1, MMRC5</i>             | mutS homolog 2                                                |
| <i>MSH3</i>   | <i>DUP, FAP4, MRP1</i>                                             | mutS homolog 3                                                |
| <i>MSH4</i>   |                                                                    | mutS homolog 4                                                |
| <i>MSH5</i>   | <i>G7, MUTSH5, NG23, POF13</i>                                     | mutS homolog 5                                                |
| <i>MSH6</i>   | <i>GTBP, GTMBP, HNPCC5, HSAP, MMRC5, p160</i>                      | mutS homolog 6                                                |
| <i>MUS81</i>  | <i>SLX3</i>                                                        | MUS81 structure-specific endonuclease subunit                 |
| <i>MUTYH</i>  | <i>MYH</i>                                                         | mutY DNA glycosylase                                          |
| <i>NBN</i>    | <i>ATV, NBS, P95, NBS1, AT-V1, AT-V2</i>                           | nibrin                                                        |
| <i>NEIL1</i>  | <i>FPG1, NEI1, hFPG1</i>                                           | nei like DNA glycosylase 1                                    |
| <i>NEIL2</i>  | <i>NEH2, NEI2</i>                                                  | nei like DNA glycosylase 2                                    |
| <i>NEIL3</i>  | <i>FPG2, FPG2, NEI3, ZGRF3, hFPG2, hNEI3</i>                       | nei like DNA glycosylase 3                                    |
| <i>NHEJ1</i>  | <i>XLF</i>                                                         | non-homologous end joining factor 1p                          |
| <i>NTHL1</i>  | <i>FAP3, NTH1, OCTS3, hNTH1</i>                                    | nth like DNA glycosylase 1                                    |
| <i>NUDT1</i>  | <i>MTH1</i>                                                        | nudix hydrolase 1                                             |
| <i>NABP2</i>  | <i>SSB1, hSSB1, OBFC2B, SOSS-B1</i>                                | nucleic acid binding protein 2                                |
| <i>OGG1</i>   | <i>HMMH, MUTM, OGH1, HOGG1</i>                                     | 8-oxoguanine DNA glycosylase                                  |
| <i>PALB2</i>  | <i>FANCN, PNCA3</i>                                                | partner and localizer of BRCA2                                |
| <i>PARP1</i>  | <i>PARP, PPOL, ADPRT, ARTD1, ADPRT1, PARP-1, ADPRT 1, pADPRT-1</i> | poly(ADP-ribose) polymerase 1                                 |
| <i>PARP2</i>  | <i>ARTD2, ADPRT2, PARP-2, ADPRTL2, ADPRTL3, pADPRT-2</i>           | poly(ADP-ribose) polymerase 2                                 |
| <i>PARP3</i>  | <i>IRT1, ARTD3, ADPRT3, ADPRTL2, ADPRTL3, PADPRT-3</i>             | poly(ADP-ribose) polymerase family member 3                   |
| <i>PCNA</i>   | <i>ATLD2</i>                                                       | proliferating cell nuclear antigen                            |
| <i>PER1</i>   | <i>PER, hPER, RIGUI</i>                                            | period circadian regulator 1                                  |
| <i>PMS1</i>   | <i>MLH2, PMSL1, hPMS1, HNPCC3</i>                                  | PMS1 homolog 1, mismatch repair system component              |
| <i>PMS2</i>   | <i>MLH4, PMSL2, HNPCC4, MMRC5, PMS2CL</i>                          | PMS1 homolog 2, mismatch repair system component              |
| <i>PMS2P3</i> | <i>PMS5, PMSR3, PMS2L3, PMS2L9</i>                                 | PMS1 homolog 2, mismatch repair system component pseudogene 3 |
| <i>PNKP</i>   | <i>PNK, AOA4, MCSZ, CMT2B2, EIEE10</i>                             | polynucleotide kinase 3'-phosphatase                          |
| <i>POLB</i>   |                                                                    | DNA polymerase beta                                           |

|               |                                                                                 |                                                     |
|---------------|---------------------------------------------------------------------------------|-----------------------------------------------------|
| <i>POLD1</i>  | <i>CDC2, MDPL, POLD, CRCS10</i>                                                 | DNA polymerase delta 1, catalytic subunit           |
| <i>POLE</i>   | <i>FILS, POLE1, CRCS12, IMAGE1</i>                                              | DNA polymerase epsilon, catalytic subunit           |
| <i>POLG</i>   | <i>PEO, MDP1, SCAE, MIRAS, POLG1, POLGA, SANDO, MTDPS4A, MTDPS4B</i>            | DNA polymerase gamma, catalytic subunit             |
| <i>POLH</i>   | <i>XPV, XP-V, RAD30, RAD30A</i>                                                 | DNA polymerase eta                                  |
| <i>POLI</i>   | <i>eta2, RAD30B, RAD30B</i>                                                     | DNA polymerase iota                                 |
| <i>POLK</i>   | <i>DINP, POLQ, DINB1</i>                                                        | DNA polymerase kappa                                |
| <i>POLL</i>   | <i>BETAN, POLKAPPA</i>                                                          | DNA polymerase lambda                               |
| <i>POLM</i>   | <i>Tdt-N, Pol Mu</i>                                                            | DNA polymerase mu                                   |
| <i>POLN</i>   | <i>POLAP</i>                                                                    | DNA polymerase nu                                   |
| <i>POLQ</i>   | <i>PRO0327</i>                                                                  | DNA polymerase theta                                |
| <i>PRKDC</i>  | <i>HYRC, p350, DNAPK, DNPk1, HYRC1, IMD26, XRCC7, DNAPKc, DNA-PKC, DNA-PKcs</i> | protein kinase, DNA-activated, catalytic subunit    |
| <i>PRPF19</i> | <i>PSO4, SNEV, PRP19, UBOX4, hPSO4, NMP200</i>                                  | pre-mRNA processing factor 19                       |
| <i>RAD1</i>   | <i>REC1, HRAD1</i>                                                              | RAD1 checkpoint DNA exonuclease                     |
| <i>RAD17</i>  | <i>CCYC, R24L, RAD24, HRAD17, RAD17SP</i>                                       | RAD17 checkpoint clamp loader component             |
| <i>RAD18</i>  | <i>RNF73</i>                                                                    | RAD18 E3 ubiquitin protein ligase                   |
| <i>RAD23A</i> | <i>HR23A, HHR23A</i>                                                            | RAD23 homolog A, nucleotide excision repair protein |
| <i>RAD23B</i> | <i>P58, HR23B, HHR23B</i>                                                       | RAD23 homolog B, nucleotide excision repair protein |
| <i>RAD50</i>  | <i>NBSLD, RAD502, hRad50</i>                                                    | RAD50 double strand break repair protein            |
| <i>RAD51</i>  | <i>RECA, BRCC5, FANCR, MRMV2, HRAD51, RAD51A, HsRad51, HsT16930</i>             | RAD51 recombinase                                   |
| <i>RAD51B</i> | <i>REC2, R51H2, RAD51L1</i>                                                     | RAD51 paralog B                                     |
| <i>RAD51C</i> | <i>FANCO, R51H3, BROVCA3, RAD51L2</i>                                           | RAD51 paralog C                                     |
| <i>RAD51D</i> | <i>TRAD, R51H3, BROVCA4, RAD51L3</i>                                            | RAD51 paralog D                                     |
| <i>RAD52</i>  |                                                                                 | RAD52 homolog, DNA repair protein                   |
| <i>RAD54B</i> | <i>RDH54</i>                                                                    | RAD54 homolog B                                     |
| <i>RAD54L</i> | <i>HR54, hHR54, RAD54A, hRAD54</i>                                              | RAD54 like                                          |
| <i>RAD9A</i>  | <i>RAD9</i>                                                                     | RAD9 checkpoint clamp component A                   |
| <i>RBBP8</i>  | <i>RIM, COM1, CTIP, JWDS, SAE2, SCKL2</i>                                       | RB binding protein 8, endonuclease                  |
| <i>RDM1</i>   | <i>RAD52B</i>                                                                   | RAD52 motif containing 1                            |



|                |                                                                |                                                                       |
|----------------|----------------------------------------------------------------|-----------------------------------------------------------------------|
| <i>RECQL</i>   | <i>RecQ1, RECQL1</i>                                           | RecQ like helicase                                                    |
| <i>RECQL4</i>  | <i>RECQ4</i>                                                   | RecQ like helicase 4                                                  |
| <i>RECQL5</i>  | <i>RECQ5</i>                                                   | RecQ like helicase 5                                                  |
| <i>REV1</i>    | <i>REV1L, AIBP80</i>                                           | REV1 DNA directed polymerase                                          |
| <i>REV3L</i>   | <i>POLZ, REV3</i>                                              | REV3 like, DNA directed polymerase<br>zeta catalytic subunit          |
| <i>RIF1</i>    |                                                                | replication timing regulatory factor 1                                |
| <i>RNF168</i>  | <i>RIDL, hRNF168</i>                                           | ring finger protein 168                                               |
| <i>RNF4</i>    | <i>SLX5, SNURF, RES4-26</i>                                    | ring finger protein 4                                                 |
| <i>RNF8</i>    | <i>hRNF8</i>                                                   | ring finger protein 8                                                 |
| <i>RPA1</i>    | <i>HSSB, RF-A, RP-A, REPA1, RPA70, MST075</i>                  | replication protein A1                                                |
| <i>RPA2</i>    | <i>REPA2, RPA32, RP-A p32, RP-A p34</i>                        | replication protein A2                                                |
| <i>RPA3</i>    | <i>REPA3, RP-A p14</i>                                         | replication protein A3                                                |
| <i>RPA4</i>    | <i>HSU24186</i>                                                | replication protein A4                                                |
| <i>RRM2B</i>   | <i>P53R2, MTDPS8A, MTDPS8B</i>                                 | ribonucleotide reductase regulatory<br>TP53 inducible subunit M2B     |
| <i>SETMAR</i>  | <i>Mar1, METNASE</i>                                           | SET domain and mariner transposase<br>fusion gene                     |
| <i>SEM1</i>    | <i>ECD, DSS1, SHFD1, SHFM1, SHSF1, PSMD15, Shfdg1, C7orf76</i> | SEM1 26S proteasome subunit                                           |
| <i>SHPRH</i>   | <i>bA545I5.2</i>                                               | SNF2 histone linker PHD RING<br>helicase                              |
| <i>SMUG1</i>   | <i>FDG, UNG3, HMUDG</i>                                        | single-strand-selective<br>monofunctional uracil-DNA<br>glycosylase 1 |
| <i>SPO11</i>   | <i>CT35, TOPVIA, SPATA43, TOPOVIA</i>                          | SPO11 initiator of meiotic double<br>stranded breaks                  |
| <i>SPRTN</i>   | <i>DVC1, PRO4323, spartan, C1orf124</i>                        | SprT-like N-terminal domain                                           |
| <i>TDG</i>     | <i>hTDG</i>                                                    | thymine DNA glycosylase                                               |
| <i>TDPI</i>    |                                                                | tyrosyl-DNA phosphodiesterase 1                                       |
| <i>TDP2</i>    | <i>EAP2, AD022, EAPII, TTRAP, hTDP2, dJ30M3.3</i>              | tyrosyl-DNA phosphodiesterase 2                                       |
| <i>TOPBP1</i>  | <i>Dpb11, TOP2BP1</i>                                          | DNA topoisomerase II binding<br>protein 1                             |
| <i>TP53</i>    | <i>P53, BCC7, LFS1, BMFS5, TRP53</i>                           | tumor protein p53                                                     |
| <i>TP53BP1</i> | <i>p202, 53BP1, TDRD30, p53BP1</i>                             | tumor protein p53 binding protein 1                                   |
| <i>TREX1</i>   | <i>CRV, AGS1, DRN3, HERNS, RVCLS</i>                           | three prime repair exonuclease 1                                      |
| <i>TREX2</i>   |                                                                | three prime repair exonuclease 2                                      |
| <i>MPLKIP</i>  | <i>ABHS, TTD4, ORF20, C7orf11</i>                              | M-phase specific PLK1 interacting<br>protein                          |

|               |                                                                  |                                                               |
|---------------|------------------------------------------------------------------|---------------------------------------------------------------|
| <i>UBE2A</i>  | <i>UBC2, HHR6A, MRXSN, RAD6A, MRXS30</i>                         | ubiquitin conjugating enzyme E2 A                             |
| <i>UBE2B</i>  | <i>HR6B, UBC2, HHR6B, RAD6B, E2-17kDa</i>                        | ubiquitin conjugating enzyme E2 B                             |
| <i>UBE2N</i>  | <i>UBC13, UbcH13, HEL-S-71, UbcH-ben, UBCHBEN, UBC13</i>         | ubiquitin conjugating enzyme E2 N                             |
| <i>UBE2V2</i> | <i>MMS2, UEV2, EDPF1, UEV-2, DDVIT1, EDAF-1, EDPF-1, DDVit-1</i> | ubiquitin conjugating enzyme E2 V2                            |
| <i>UNG</i>    | <i>DGU, UDG, UNG1, UNG2, HIGM4, HIGM5, UNG15</i>                 | uracil DNA glycosylase                                        |
| <i>UVSSA</i>  | <i>UVSS3, KIAA1530</i>                                           | UV stimulated scaffold protein A                              |
| <i>WRN</i>    | <i>RECQ3, RECQL2, RECQL3</i>                                     | WRN RecQ like helicase                                        |
| <i>XAB2</i>   | <i>HCNP, HCRN, SYF1, NTC90</i>                                   | XPA binding protein 2                                         |
| <i>XPA</i>    | <i>XP1, XPAC</i>                                                 | XPA, DNA damage recognition and repair factor                 |
| <i>XPC</i>    | <i>XP3, RAD4, XPCC, p125</i>                                     | XPC complex subunit, DNA damage recognition and repair factor |
| <i>XRCC1</i>  | <i>RCC, SCAR26</i>                                               | X-ray repair cross complementing 1                            |
| <i>XRCC2</i>  | <i>FANCU, POF17, SPGF50</i>                                      | X-ray repair cross complementing 2                            |
| <i>XRCC3</i>  | <i>CMM6</i>                                                      | X-ray repair cross complementing 3                            |
| <i>XRCC4</i>  | <i>SSMED</i>                                                     | X-ray repair cross complementing 4                            |
| <i>XRCC5</i>  | <i>KU80, KUB2, Ku86, NFIV, KARP1, KARP-1</i>                     | X-ray repair cross complementing 5                            |
| <i>XRCC6</i>  | <i>ML8, KU70, TLAA, CTC75, CTCBF, G22P1</i>                      | X-ray repair cross complementing 6                            |

---

**Table S3.** Probe coverage in the EPIC array for DNA repair genes followed in our study. Some probes overlap between gene regions based on their genomic localization.

| Gene           | Whole gene | TSS200 | TSS1500 | 5'UTR | 1stExon | Body | ExonBoundary | 3'UTR |
|----------------|------------|--------|---------|-------|---------|------|--------------|-------|
| <i>ALKBH2</i>  | 20         | 4      | 4       | 7     | 4       | 9    | 0            | 0     |
| <i>ALKBH3</i>  | 30         | 3      | 5       | 5     | 1       | 16   | 0            | 1     |
| <i>APEX1</i>   | 16         | 2      | 5       | 7     | 5       | 3    | 0            | 0     |
| <i>APEX2</i>   | 12         | 2      | 4       | 2     | 3       | 2    | 0            | 0     |
| <i>APLF</i>    | 26         | 5      | 6       | 2     | 2       | 13   | 0            | 0     |
| <i>APTX</i>    | 18         | 5      | 4       | 10    | 4       | 11   | 0            | 0     |
| <i>ATM</i>     | 71         | 6      | 33      | 6     | 4       | 23   | 1            | 1     |
| <i>ATR</i>     | 30         | 5      | 5       | 2     | 2       | 18   | 0            | 0     |
| <i>ATRIP</i>   | 27         | 5      | 7       | 2     | 3       | 15   | 1            | 0     |
| <i>BLM</i>     | 46         | 5      | 5       | 17    | 3       | 29   | 1            | 1     |
| <i>BRCA1</i>   | 50         | 14     | 35      | 18    | 11      | 16   | 1            | 1     |
| <i>BRCA2</i>   | 21         | 3      | 4       | 4     | 0       | 9    | 1            | 1     |
| <i>BRIP1</i>   | 25         | 4      | 7       | 2     | 1       | 11   | 0            | 1     |
| <i>BTBD12</i>  | 19         | 0      | 1       | 3     | 0       | 14   | 0            | 1     |
| <i>CCNH</i>    | 20         | 5      | 5       | 5     | 4       | 10   | 1            | 0     |
| <i>CDK7</i>    | 19         | 5      | 3       | 5     | 5       | 6    | 0            | 0     |
| <i>CETN2</i>   | 19         | 4      | 9       | 0     | 0       | 5    | 0            | 1     |
| <i>CLK2</i>    | 31         | 6      | 4       | 7     | 3       | 14   | 0            | 2     |
| <i>DCLRE1A</i> | 24         | 13     | 12      | 5     | 5       | 5    | 0            | 1     |
| <i>DCLRE1B</i> | 17         | 0      | 9       | 1     | 1       | 4    | 0            | 1     |
| <i>DCLRE1C</i> | 35         | 7      | 3       | 8     | 2       | 16   | 0            | 1     |
| <i>DDB1</i>    | 39         | 2      | 8       | 6     | 6       | 23   | 2            | 1     |
| <i>DDB2</i>    | 17         | 1      | 5       | 1     | 1       | 9    | 0            | 1     |
| <i>DMC1</i>    | 16         | 0      | 9       | 8     | 3       | 3    | 0            | 0     |
| <i>DUT</i>     | 27         | 8      | 15      | 14    | 6       | 15   | 0            | 0     |
| <i>EME1</i>    | 23         | 3      | 6       | 9     | 3       | 3    | 1            | 2     |
| <i>EME2</i>    | 20         | 3      | 5       | 0     | 3       | 9    | 1            | 0     |
| <i>ENDOV</i>   | 16         | 0      | 0       | 0     | 0       | 16   | 2            | 1     |
| <i>ERCC1</i>   | 20         | 10     | 7       | 7     | 3       | 2    | 0            | 2     |
| <i>ERCC2</i>   | 25         | 2      | 2       | 4     | 4       | 18   | 0            | 1     |
| <i>ERCC3</i>   | 16         | 4      | 2       | 1     | 2       | 7    | 0            | 1     |
| <i>ERCC4</i>   | 31         | 4      | 5       | 0     | 1       | 19   | 0            | 2     |
| <i>ERCC5</i>   | 31         | 6      | 3       | 1     | 2       | 20   | 1            | 0     |

|               |    |    |    |    |    |    |   |   |
|---------------|----|----|----|----|----|----|---|---|
| <i>ERCC6</i>  | 52 | 6  | 9  | 5  | 1  | 31 | 0 | 1 |
| <i>ERCC8</i>  | 24 | 4  | 3  | 5  | 4  | 12 | 0 | 1 |
| <i>EXO1</i>   | 19 | 7  | 7  | 10 | 4  | 4  | 0 | 1 |
| <i>FAAP20</i> | 27 | 5  | 6  | 13 | 2  | 13 | 1 | 4 |
| <i>FAAP24</i> | 1  | 0  | 0  | 0  | 0  | 0  | 0 | 1 |
| <i>FAN1</i>   | 12 | 1  | 1  | 1  | 1  | 10 | 1 | 0 |
| <i>FANCA</i>  | 46 | 0  | 8  | 0  | 0  | 37 | 3 | 2 |
| <i>FANCB</i>  | 17 | 5  | 6  | 5  | 2  | 1  | 0 | 0 |
| <i>FANCC</i>  | 80 | 1  | 4  | 20 | 1  | 49 | 0 | 1 |
| <i>FANCD2</i> | 36 | 4  | 5  | 8  | 1  | 18 | 2 | 1 |
| <i>FANCE</i>  | 12 | 3  | 4  | 1  | 1  | 3  | 0 | 1 |
| <i>FANCF</i>  | 24 | 8  | 7  | 1  | 10 | 0  | 0 | 1 |
| <i>FANCG</i>  | 19 | 6  | 4  | 2  | 3  | 5  | 0 | 1 |
| <i>FANCI</i>  | 24 | 4  | 5  | 5  | 1  | 10 | 1 | 0 |
| <i>FANCL</i>  | 22 | 4  | 3  | 2  | 3  | 11 | 1 | 1 |
| <i>FANCM</i>  | 31 | 4  | 11 | 1  | 4  | 11 | 1 | 0 |
| <i>FEN1</i>   | 26 | 7  | 5  | 10 | 6  | 3  | 0 | 1 |
| <i>GEN1</i>   | 25 | 2  | 7  | 11 | 4  | 8  | 1 | 1 |
| <i>GTF2H1</i> | 32 | 5  | 5  | 9  | 4  | 12 | 0 | 1 |
| <i>GTF2H3</i> | 29 | 8  | 7  | 5  | 1  | 12 | 0 | 1 |
| <i>GTF2H4</i> | 56 | 1  | 4  | 4  | 3  | 41 | 0 | 6 |
| <i>GTF2H5</i> | 22 | 6  | 5  | 7  | 0  | 3  | 0 | 1 |
| <i>H2AX</i>   | 12 | 5  | 3  | 2  | 4  | 0  | 0 | 1 |
| <i>HELQ</i>   | 17 | 5  | 5  | 5  | 3  | 5  | 0 | 0 |
| <i>HLTF</i>   | 36 | 5  | 17 | 2  | 2  | 11 | 1 | 1 |
| <i>HUS1</i>   | 16 | 3  | 1  | 1  | 1  | 9  | 1 | 1 |
| <i>CHAF1A</i> | 22 | 1  | 4  | 0  | 1  | 16 | 0 | 0 |
| <i>CHEK1</i>  | 27 | 4  | 9  | 12 | 8  | 15 | 1 | 4 |
| <i>CHEK2</i>  | 26 | 4  | 6  | 7  | 1  | 8  | 1 | 0 |
| <i>LIG1</i>   | 35 | 2  | 4  | 9  | 5  | 24 | 1 | 1 |
| <i>LIG3</i>   | 19 | 5  | 6  | 2  | 1  | 4  | 0 | 2 |
| <i>LIG4</i>   | 28 | 11 | 14 | 21 | 6  | 0  | 0 | 0 |
| <i>MAD2L2</i> | 37 | 6  | 10 | 27 | 7  | 3  | 1 | 1 |
| <i>MBD4</i>   | 29 | 9  | 5  | 7  | 9  | 6  | 1 | 0 |
| <i>MDC1</i>   | 64 | 4  | 10 | 33 | 17 | 16 | 2 | 1 |

|               |     |    |    |    |    |     |   |   |
|---------------|-----|----|----|----|----|-----|---|---|
| <i>MGMT</i>   | 165 | 4  | 18 | 1  | 1  | 139 | 0 | 3 |
| <i>MLH1</i>   | 55  | 15 | 30 | 14 | 6  | 22  | 0 | 1 |
| <i>MLH3</i>   | 28  | 3  | 1  | 4  | 1  | 19  | 1 | 1 |
| <i>MMS19</i>  | 22  | 5  | 9  | 2  | 1  | 13  | 2 | 0 |
| <i>MNAT1</i>  | 23  | 5  | 3  | 1  | 1  | 30  | 1 | 0 |
| <i>MPG</i>    | 21  | 7  | 13 | 9  | 2  | 6   | 0 | 0 |
| <i>MPLKIP</i> | 14  | 5  | 5  | 3  | 2  | 1   | 1 | 1 |
| <i>MRE11</i>  | 14  | 3  | 4  | 7  | 4  | 10  | 0 | 1 |
| <i>MSH2</i>   | 19  | 2  | 5  | 1  | 2  | 16  | 0 | 0 |
| <i>MSH3</i>   | 16  | 1  | 3  | 2  | 2  | 29  | 0 | 0 |
| <i>MSH4</i>   | 15  | 1  | 6  | 1  | 2  | 6   | 0 | 0 |
| <i>MSH5</i>   | 19  | 8  | 12 | 11 | 8  | 31  | 1 | 1 |
| <i>MSH6</i>   | 15  | 3  | 6  | 2  | 2  | 4   | 0 | 0 |
| <i>MUS81</i>  | 19  | 4  | 9  | 1  | 1  | 14  | 3 | 3 |
| <i>MUTYH</i>  | 24  | 12 | 15 | 21 | 8  | 18  | 3 | 0 |
| <i>NABP2</i>  | 19  | 5  | 3  | 5  | 5  | 5   | 0 | 1 |
| <i>NBN</i>    | 17  | 5  | 5  | 3  | 1  | 8   | 0 | 0 |
| <i>NEIL1</i>  | 33  | 7  | 11 | 15 | 6  | 14  | 0 | 0 |
| <i>NEIL2</i>  | 19  | 5  | 4  | 7  | 4  | 2   | 0 | 1 |
| <i>NEIL3</i>  | 24  | 6  | 2  | 0  | 3  | 12  | 0 | 1 |
| <i>NHEJ1</i>  | 33  | 4  | 5  | 7  | 0  | 17  | 0 | 2 |
| <i>NTHL1</i>  | 30  | 2  | 6  | 0  | 2  | 17  | 0 | 3 |
| <i>NUDT1</i>  | 30  | 6  | 12 | 7  | 2  | 11  | 0 | 1 |
| <i>OGG1</i>   | 29  | 5  | 5  | 5  | 6  | 12  | 0 | 5 |
| <i>PALB2</i>  | 28  | 5  | 5  | 3  | 4  | 14  | 1 | 0 |
| <i>PARP1</i>  | 35  | 3  | 2  | 3  | 5  | 24  | 2 | 1 |
| <i>PARP2</i>  | 18  | 2  | 2  | 0  | 3  | 13  | 3 | 0 |
| <i>PARP3</i>  | 24  | 5  | 8  | 4  | 2  | 8   | 0 | 1 |
| <i>PCNA</i>   | 35  | 12 | 10 | 20 | 5  | 3   | 0 | 0 |
| <i>PER1</i>   | 18  | 4  | 5  | 2  | 0  | 6   | 0 | 1 |
| <i>PMS1</i>   | 37  | 4  | 7  | 16 | 10 | 21  | 2 | 0 |
| <i>PMS2</i>   | 15  | 0  | 2  | 3  | 3  | 13  | 0 | 0 |
| <i>PMS2L3</i> | 11  | 6  | 2  | 0  | 0  | 3   | 0 | 0 |
| <i>PNKP</i>   | 14  | 1  | 2  | 2  | 1  | 8   | 0 | 1 |
| <i>POLB</i>   | 18  | 3  | 5  | 1  | 1  | 9   | 0 | 0 |

|               |     |   |    |    |   |     |   |   |
|---------------|-----|---|----|----|---|-----|---|---|
| <i>POLD1</i>  | 25  | 2 | 5  | 6  | 1 | 14  | 0 | 0 |
| <i>POLE</i>   | 55  | 4 | 1  | 2  | 2 | 75  | 1 | 0 |
| <i>POLG</i>   | 33  | 3 | 9  | 2  | 2 | 21  | 1 | 0 |
| <i>POLH</i>   | 21  | 3 | 6  | 9  | 4 | 6   | 0 | 1 |
| <i>POLI</i>   | 21  | 5 | 3  | 0  | 1 | 7   | 0 | 1 |
| <i>POLK</i>   | 41  | 2 | 6  | 24 | 1 | 9   | 1 | 0 |
| <i>POLL</i>   | 29  | 5 | 7  | 6  | 2 | 14  | 0 | 1 |
| <i>POLM</i>   | 19  | 4 | 4  | 1  | 2 | 8   | 1 | 1 |
| <i>POLN</i>   | 52  | 2 | 3  | 5  | 2 | 41  | 1 | 1 |
| <i>POLQ</i>   | 37  | 5 | 6  | 3  | 4 | 21  | 0 | 1 |
| <i>PRKDC</i>  | 78  | 4 | 7  | 0  | 2 | 64  | 2 | 1 |
| <i>PRPF19</i> | 17  | 5 | 5  | 1  | 1 | 5   | 0 | 1 |
| <i>RAD1</i>   | 23  | 4 | 7  | 8  | 3 | 14  | 0 | 1 |
| <i>RAD17</i>  | 40  | 9 | 27 | 16 | 2 | 6   | 1 | 4 |
| <i>RAD18</i>  | 26  | 4 | 5  | 0  | 0 | 15  | 0 | 2 |
| <i>RAD23A</i> | 16  | 5 | 5  | 2  | 2 | 4   | 0 | 0 |
| <i>RAD23B</i> | 26  | 6 | 8  | 12 | 9 | 17  | 0 | 1 |
| <i>RAD50</i>  | 29  | 4 | 5  | 5  | 3 | 17  | 2 | 0 |
| <i>RAD51</i>  | 19  | 7 | 5  | 4  | 3 | 4   | 0 | 1 |
| <i>RAD51B</i> | 169 | 2 | 2  | 3  | 1 | 162 | 0 | 0 |
| <i>RAD51C</i> | 22  | 2 | 10 | 0  | 0 | 10  | 0 | 0 |
| <i>RAD51D</i> | 8   | 1 | 2  | 0  | 0 | 5   | 1 | 0 |
| <i>RAD52</i>  | 34  | 9 | 2  | 13 | 1 | 19  | 2 | 0 |
| <i>RAD54B</i> | 29  | 6 | 6  | 5  | 2 | 18  | 0 | 0 |
| <i>RAD54L</i> | 21  | 2 | 4  | 6  | 6 | 9   | 1 | 0 |
| <i>RAD9A</i>  | 23  | 3 | 7  | 1  | 2 | 12  | 1 | 2 |
| <i>RBBP8</i>  | 19  | 5 | 8  | 6  | 2 | 6   | 0 | 0 |
| <i>RDM1</i>   | 14  | 4 | 8  | 1  | 4 | 10  | 0 | 1 |
| <i>RECQL</i>  | 17  | 2 | 6  | 6  | 5 | 4   | 1 | 0 |
| <i>RECQL4</i> | 18  | 4 | 6  | 0  | 0 | 10  | 0 | 0 |
| <i>RECQL5</i> | 62  | 3 | 5  | 5  | 5 | 49  | 0 | 3 |
| <i>REVI</i>   | 28  | 0 | 3  | 3  | 1 | 22  | 1 | 0 |
| <i>REV3L</i>  | 47  | 3 | 9  | 10 | 3 | 29  | 1 | 0 |
| <i>RIF1</i>   | 19  | 6 | 2  | 3  | 1 | 9   | 1 | 1 |
| <i>RNF168</i> | 22  | 4 | 6  | 2  | 4 | 7   | 0 | 1 |

|                |    |    |    |    |   |    |   |   |
|----------------|----|----|----|----|---|----|---|---|
| <i>RNF4</i>    | 35 | 7  | 6  | 15 | 1 | 9  | 1 | 1 |
| <i>RNF8</i>    | 23 | 3  | 5  | 2  | 3 | 11 | 0 | 1 |
| <i>RPA1</i>    | 46 | 0  | 4  | 0  | 0 | 35 | 1 | 8 |
| <i>RPA2</i>    | 19 | 6  | 5  | 3  | 3 | 4  | 0 | 1 |
| <i>RPA3</i>    | 29 | 0  | 1  | 21 | 1 | 5  | 0 | 1 |
| <i>RPA4</i>    | 5  | 2  | 2  | 1  | 1 | 0  | 0 | 0 |
| <i>RRM2B</i>   | 19 | 5  | 4  | 5  | 5 | 6  | 0 | 1 |
| <i>SEMI</i>    | 13 | 4  | 4  | 1  | 2 | 3  | 0 | 0 |
| <i>SETMAR</i>  | 18 | 8  | 4  | 1  | 4 | 7  | 0 | 0 |
| <i>SHPRH</i>   | 30 | 5  | 8  | 6  | 2 | 12 | 1 | 1 |
| <i>SLX1A</i>   | 7  | 0  | 0  | 0  | 0 | 7  | 1 | 0 |
| <i>SLX1B</i>   | 7  | 0  | 0  | 0  | 0 | 7  | 1 | 0 |
| <i>SMUG1</i>   | 28 | 6  | 4  | 11 | 1 | 12 | 1 | 1 |
| <i>SPO11</i>   | 19 | 5  | 3  | 2  | 1 | 9  | 0 | 0 |
| <i>SPRTN</i>   | 11 | 1  | 2  | 4  | 4 | 4  | 0 | 0 |
| <i>TDG</i>     | 19 | 3  | 3  | 3  | 2 | 9  | 0 | 1 |
| <i>TDP1</i>    | 30 | 1  | 9  | 12 | 2 | 8  | 0 | 0 |
| <i>TDP2</i>    | 7  | 1  | 1  | 0  | 1 | 4  | 0 | 0 |
| <i>TOPBP1</i>  | 25 | 6  | 5  | 4  | 1 | 10 | 1 | 0 |
| <i>TP53</i>    | 42 | 4  | 15 | 22 | 5 | 7  | 1 | 1 |
| <i>TP53BP1</i> | 48 | 16 | 9  | 13 | 5 | 18 | 1 | 0 |
| <i>TREX1</i>   | 18 | 3  | 7  | 6  | 7 | 1  | 0 | 1 |
| <i>TREX2</i>   | 17 | 6  | 5  | 2  | 1 | 5  | 0 | 0 |
| <i>UBE2A</i>   | 20 | 6  | 5  | 4  | 4 | 5  | 0 | 1 |
| <i>UBE2B</i>   | 18 | 5  | 3  | 1  | 1 | 8  | 0 | 1 |
| <i>UBE2N</i>   | 28 | 5  | 5  | 5  | 4 | 12 | 0 | 2 |
| <i>UBE2V2</i>  | 25 | 4  | 6  | 0  | 0 | 14 | 1 | 1 |
| <i>UNG</i>     | 28 | 9  | 8  | 4  | 5 | 12 | 1 | 3 |
| <i>UVSSA</i>   | 25 | 0  | 0  | 2  | 2 | 24 | 0 | 0 |
| <i>WRN</i>     | 37 | 3  | 9  | 21 | 8 | 4  | 0 | 1 |
| <i>XAB2</i>    | 20 | 6  | 1  | 0  | 2 | 13 | 0 | 1 |
| <i>XPA</i>     | 8  | 3  | 0  | 2  | 2 | 4  | 0 | 0 |
| <i>XPC</i>     | 33 | 7  | 3  | 2  | 2 | 20 | 2 | 1 |
| <i>XRCC1</i>   | 26 | 8  | 6  | 2  | 1 | 13 | 0 | 0 |
| <i>XRCC2</i>   | 12 | 4  | 2  | 1  | 2 | 5  | 0 | 0 |

## Supplementary Material

|              |    |   |   |    |   |    |   |   |
|--------------|----|---|---|----|---|----|---|---|
| <i>XRCC3</i> | 55 | 5 | 6 | 16 | 1 | 25 | 0 | 2 |
| <i>XRCC4</i> | 38 | 5 | 4 | 11 | 6 | 15 | 0 | 0 |
| <i>XRCC5</i> | 29 | 2 | 4 | 1  | 1 | 21 | 1 | 1 |
| <i>XRCC6</i> | 34 | 3 | 8 | 11 | 0 | 11 | 1 | 0 |



**Table S4.** Differential methylation analysis results. Results from differential methylation analysis at cg probe level. In total analysis, 27 cg probes with higher methylation profile in platinum-sensitive patients (positive logFC, red color) and 23 cg probes with lower methylation profile compared to platinum-resistant patients (negative logFC, blue color) shown.

| <b>Probe</b> | <b>Gene</b>    | <b>logFC</b> | <b>P-value</b>            |
|--------------|----------------|--------------|---------------------------|
| cg17991919   | <i>RAD50</i>   | 1.43         | 3.724 x 10 <sup>-06</sup> |
| cg06340416   | <i>RAD50</i>   | 1.11         | 5.971 x 10 <sup>-05</sup> |
| cg05258927   | <i>RAD50</i>   | 1.31         | 1.0 x 10 <sup>-04</sup>   |
| cg05198819   | <i>RAD50</i>   | 0.80         | 6.0 x 10 <sup>-04</sup>   |
| cg08207536   | <i>FANCD2</i>  | 0.48         | 7.0 x 10 <sup>-04</sup>   |
| cg02201766   | <i>RAD50</i>   | 0.61         | 9.0 x 10 <sup>-04</sup>   |
| cg10461218   | <i>GTF2H3</i>  | -0.56        | 0.001                     |
| cg16078412   | <i>NHEJ1</i>   | 0.64         | 0.001                     |
| cg08110332   | <i>MBD4</i>    | -0.26        | 0.002                     |
| cg02762573   | <i>RAD51C</i>  | -0.36        | 0.002                     |
| cg26467754   | <i>RECQL4</i>  | -0.45        | 0.002                     |
| cg02777063   | <i>RPA3</i>    | -0.25        | 0.002                     |
| cg01916724   | <i>PARP3</i>   | 0.41         | 0.003                     |
| cg26975850   | <i>POLK</i>    | -0.64        | 0.003                     |
| cg02700841   | <i>PRKDC</i>   | -0.63        | 0.003                     |
| cg22996031   | <i>RAD9A</i>   | 0.52         | 0.003                     |
| cg08136893   | <i>C7orf11</i> | -0.21        | 0.003                     |
| cg07550334   | <i>MLH3</i>    | -0.16        | 0.004                     |
| cg18538644   | <i>PRKDC</i>   | -0.22        | 0.004                     |
| cg11714602   | <i>RAD50</i>   | -0.64        | 0.004                     |
| cg15079957   | <i>RNF4</i>    | -0.68        | 0.004                     |
| cg24422008   | <i>PARP1</i>   | -0.18        | 0.004                     |
| cg14816013   | <i>OBFC2B</i>  | -0.19        | 0.004                     |
| cg02447314   | <i>POLI</i>    | -0.29        | 0.005                     |
| cg20674128   | <i>ERCC2</i>   | 0.68         | 0.005                     |
| cg20537325   | <i>MGMT</i>    | 0.89         | 0.005                     |
| cg24054272   | <i>CLK2</i>    | -0.26        | 0.005                     |
| cg06084702   | <i>MAD2L2</i>  | 0.61         | 0.005                     |
| cg07386086   | <i>PRKDC</i>   | -0.78        | 0.006                     |
| cg00711252   | <i>CHEK2</i>   | 0.66         | 0.006                     |
| cg16134717   | <i>MAD2L2</i>  | 0.89         | 0.006                     |

|            |                |       |       |
|------------|----------------|-------|-------|
| cg11514965 | <i>RAD51B</i>  | -0.70 | 0.006 |
| cg13284983 | <i>PER1</i>    | 0.42  | 0.007 |
| cg22492943 | <i>LIG4</i>    | -0.19 | 0.007 |
| cg17726328 | <i>ATM</i>     | -0.56 | 0.007 |
| cg02021919 | <i>CCNH</i>    | 0.62  | 0.007 |
| cg16003913 | <i>MPG</i>     | 0.46  | 0.007 |
| cg21226234 | <i>RECQL4</i>  | 0.32  | 0.007 |
| cg01702039 | <i>POLE</i>    | -0.58 | 0.008 |
| cg19229566 | <i>NEIL1</i>   | 0.22  | 0.008 |
| cg26959303 | <i>TOPBP1</i>  | -0.33 | 0.008 |
| cg14597804 | <i>RAD50</i>   | -0.59 | 0.008 |
| cg13619810 | <i>RPA3</i>    | -0.20 | 0.008 |
| cg14200364 | <i>MSH4</i>    | 0.61  | 0.009 |
| cg27056559 | <i>MGMT</i>    | 0.85  | 0.009 |
| cg18511205 | <i>EME1</i>    | 0.41  | 0.009 |
| cg15559074 | <i>ALKBH3</i>  | 0.60  | 0.009 |
| cg16158782 | <i>MSH3</i>    | 0.55  | 0.009 |
| cg09475882 | <i>TOPBP1</i>  | 0.29  | 0.009 |
| cg08279097 | <i>DCLRE1B</i> | 0.63  | 0.009 |

---

**Table S5.** Differentially methylated genes and gene regions (TSS200, TSS1500, or promoter). Analysis showed higher methylation profile of DNA repair genes regions for all these genes in patients with resistant status (positive logFC, red color). Only for *RAD50* (TSS1500 region) and *XRCC4* (whole gene) methylation profile was higher in EOC patients with platinum-sensitive status (negative logFC, blue color).

| <b>Gene</b>       | <b>logFC</b> | <b>P-value</b> |
|-------------------|--------------|----------------|
| <b>TSS200</b>     |              |                |
| <i>MLH3</i>       | 0.16         | 0.001          |
| <i>MRE11A</i>     | 0.17         | 0.007          |
| <i>GTF2H3</i>     | 0.13         | 0.025          |
| <i>HLTF</i>       | 0.27         | 0.026          |
| <i>CCNH</i>       | 0.13         | 0.049          |
| <b>TSS1500</b>    |              |                |
| <i>PMS2L3</i>     | 0.10         | 0.007          |
| <i>RAD50</i>      | -0.70        | 0.007          |
| <i>SHFM1</i>      | 0.50         | 0.014          |
| <i>DMC1</i>       | 0.41         | 0.024          |
| <i>FANCG</i>      | 0.69         | 0.034          |
| <i>CHEK2</i>      | 0.10         | 0.035          |
| <i>MRE11A</i>     | 0.16         | 0.036          |
| <i>PARP3</i>      | 0.13         | 0.037          |
| <i>RAD9A</i>      | 0.14         | 0.042          |
| <i>TP53BP1</i>    | 0.11         | 0.043          |
| <b>Promoter</b>   |              |                |
| <i>MLH3</i>       | 0.16         | 0.001          |
| <i>MRE11A</i>     | 0.17         | 0.007          |
| <i>GTF2H3</i>     | 0.13         | 0.025          |
| <i>HLTF</i>       | 0.27         | 0.025          |
| <i>CCNH</i>       | 0.13         | 0.049          |
| <b>Whole gene</b> |              |                |
| <i>XRCC4</i>      | -0.32        | 0.045          |

**Table S6.** Overview of significant potentially impactful somatic mutations in DNA repair genes.

| Gene         | Sample ID            | Variant classification | Variant type | dbSNP (v151) accession no. | Genome change                                                                             | Protein change      | Chrom.  | Start Position | End position |
|--------------|----------------------|------------------------|--------------|----------------------------|-------------------------------------------------------------------------------------------|---------------------|---------|----------------|--------------|
| <i>BRCA1</i> | Sample no. 28        | Splice Site            | SNV          | rs80358041                 | g.chr17:43051062C>T                                                                       | p.L1476fs           | chr17   | 43051062       | 43051062     |
|              | Sample no. 48        | Frame Shift Del        | DEL          |                            | g.chr17:43076608delA                                                                      |                     | chr17   | 43076608       | 43076608     |
| <i>PRKDC</i> | Sample no. 25        | Missense               | SNV          |                            | g.chr8:47798352T>C                                                                        | p.E3448G            | chr8    | 47798352       | 47798352     |
|              | Sample no. 39        | Missense               | DNV          |                            | g.chr8:47893258_47893259TA>CG                                                             | p.Y1243R            | chr8    | 47893258       | 47893259     |
|              | Sample no. 39        | Frame Shift Ins        | INS          |                            | g.chr8:47893263_47893264ins<br>CCAGCTGCAAATGCAAAT<br>GCCATTATATTTAAAATCA<br>GACGACATAACAC | p.L1242fs           | chr8    | 47893263       | 47893264     |
|              | TCGA-13-0795         | Missense               | SNV          |                            |                                                                                           | p.K2716R            | chr8    | 48746759       | 48746759     |
|              | TCGA-13-0899         | Frame Shift Ins        | INS          |                            |                                                                                           | p.G3646A<br>fs*4    | chr8    | 48697841       | 48697842     |
|              | TCGA-13-1477         | Missense               | SNV          |                            |                                                                                           | p.A2960T            | chr8    | 48736460       | 48736460     |
|              | TCGA-61-2110         | Missense               | SNV          |                            |                                                                                           | p.V3600L            | chr8    | 48701568       | 48701568     |
|              | TCGA-09-2044         | Missense               | SNV          |                            |                                                                                           | p.P3972Q            | chr8    | 48690371       | 48690371     |
|              | TCGA-24-1565         | Frame Shift Del        | DEL          |                            |                                                                                           | p.K2220N<br>fs*18   | chr8    | 48767881       | 48767881     |
|              | <i>RAD9A</i>         | Sample no. 28          | Missense     | SNV                        | rs754732107                                                                               | g.chr11:67395816G>A | p.E184K | chr11          | 67395816     |
| Sample no. 5 |                      | Missense               | SNV          | rs1360441369               | g.chr11:67392196G>A                                                                       | p.G24R              | chr11   | 67392196       | 67392196     |
| <i>TP53</i>  | Sample no. 25        | Missense               | SNV          | rs1057519992               | g.chr17:7674890T>C                                                                        | p.H214R             | chr17   | 7674890        | 7674890      |
|              | Sample no. 56/no. 14 | Missense               | SNV          | rs28934576                 | g.chr17:7673802C>T                                                                        | p.R273H             | chr17   | 7673802        | 7673802      |

|                                          |                 |     |              |                                                             |          |       |          |          |
|------------------------------------------|-----------------|-----|--------------|-------------------------------------------------------------|----------|-------|----------|----------|
| Sample no. 48                            | Missense        | SNV | rs483352695  | g.chr17:7674227T>C                                          | p.M246V  | chr17 | 7674227  | 7674227  |
| Sample no. 28                            | Splice Site     | SNV | rs80358041   | g.chr17:43051062C>T                                         | p.Y163C  | chr17 | 43051062 | 43051062 |
| Sample no. 39/no. 23/no. 27              | Nonsense        | SNV | rs397516436  | g.chr17:7674894G>A                                          | p.R213*  | chr17 | 7674894  | 7674894  |
| Sample no. 62                            | Missense        | SNV | rs786202962  | g.chr17:7675085C>A                                          | p.C176F  | chr17 | 7675085  | 7675085  |
| Sample no. 68                            | Missense        | SNV | rs28934574   | g.chr17:7673776G>A                                          | p.R282W  | chr17 | 7673776  | 7673776  |
| Sample no. 69/no. 71/no. 17/no.21/no. 10 | Missense        | SNV | rs28934578   | g.chr17:7675088C>T                                          | p.R175H  | chr17 | 7675088  | 7675088  |
| Sample no. 61                            | Frame Shift Ins | INS |              | g.chr17:7673582_7673583insA                                 | p.P316fs | chr17 | 7673582  | 7673583  |
| Sample no. 18                            | Missense        | SNV | rs1057519976 | g.chr17:7675207G>C                                          | p.C135W  | chr17 | 7675207  | 7675207  |
| Sample no. 19                            | Missense        | SNV | rs876660754  | g.chr17:7675095C>A                                          | p.V173L  | chr17 | 7675095  | 7675095  |
| Sample no. 59                            | Missense        | SNV | rs1057519996 | g.chr17:7675217T>C                                          | p.K132R  | chr17 | 7675217  | 7675217  |
| Sample no. 59                            | Missense        | SNV | rs1057519991 | g.chr17:7675076T>C                                          | p.H179R  | chr17 | 7675076  | 7675076  |
| Sample no. 2                             | Frame Shift Del | DEL |              | g.chr17:7670694_7670695delC<br>G                            | p.F338fs | chr17 | 7670694  | 7670695  |
| Sample no. 31/no.1                       | Missense        | SNV | rs11540652   | g.chr17:7674220C>T                                          | p.R248Q  | chr17 | 7674220  | 7674220  |
| Sample no. 32                            | Missense        | SNV |              | g.chr17:7673806C>G                                          | p.V272L  | chr17 | 7673806  | 7673806  |
| Sample no. 37                            | Missense        | SNV |              | g.chr17:7670702T>C                                          | p.E336G  | chr17 | 7670702  | 7670702  |
| Sample no. 37                            | Missense        | SNV |              | g.chr17:7674899G>A                                          | p.T211I  | chr17 | 7674899  | 7674899  |
| Sample no. 38                            | Frame Shift Del | DEL | rs864309495  | g.chr17:7674895delA                                         | p.R213fs | chr17 | 7674895  | 7674895  |
| Sample no. 41                            | Missense        | SNV | rs786201059  | g.chr17:7673764C>T                                          | p.E286K  | chr17 | 7673764  | 7673764  |
| Sample no. 43                            | Nonsense        | SNV |              | g.chr17:7674939C>A                                          | p.E198*  | chr17 | 7674939  | 7674939  |
| Sample no. 44                            | Missense        | SNV | rs863224451  | g.chr17:7673796C>A                                          | p.C275F  | chr17 | 7673796  | 7673796  |
| Sample no. 47                            | Frame Shift Ins | INS |              | g.chr17:7674912_7674913insC<br>AAATACTCCACACGCAA<br>TTTCCTT | p.D207fs | chr17 | 7674912  | 7674913  |

|            |               |                 |     |             |                                    |                |       |          |          |
|------------|---------------|-----------------|-----|-------------|------------------------------------|----------------|-------|----------|----------|
|            | Sample no. 52 | Splice Site     | SNV |             | g.chr17:7674859C>T                 | p.E224E        | chr17 | 7674859  | 7674859  |
|            | Sample no. 54 | Nonsense        | SNV | rs876660821 | g.chr17:7675075A>C                 | p.H179Q        | chr17 | 7675075  | 7675075  |
|            | Sample no. 55 | Missense        | SNV | rs121912656 | g.chr17:7674229C>G                 | p.G245A        | chr17 | 7674229  | 7674229  |
|            | Sample no. 8  | Missense        | SNV | rs28934574  | g.chr17:7673776G>C                 | p.R282G        | chr17 | 7673776  | 7673776  |
|            | Sample no. 9  | Frame Shift Del | DEL |             | g.chr17:7676145delG                | p.P75fs        | chr17 | 7676145  | 7676145  |
|            | Sample no. 1  | Nonsense        | SNV | rs121913344 | g.chr17:7673704G>A                 | p.R306*        | chr17 | 7673704  | 7673704  |
|            | Sample no. 12 | Splice Site     | SNV |             | g.chr17:7674180C>A                 |                | chr17 | 7674180  | 7674180  |
|            | Sample no. 13 | Missense        | SNV | rs121912656 | g.chr17:7674229C>T                 | p.G245D        | chr17 | 7674229  | 7674229  |
| <i>XPC</i> | Sample no. 25 | Splice Site     | DEL | rs750450365 | g.chr3:14178466_14178468del<br>CCT | p.Glu34de<br>1 | chr3  | 14178466 | 14178468 |
|            | Sample no. 56 | Missense        | SNV |             | g.chr3:14158586C>T                 | p.E433K        | chr3  | 14158586 | 14158586 |

Footnotes: SNV (single nucleotide variant), DEL (deletion), DNV (double nucleotide variant), INS (insertion), Chrom. (Chromosome)

**Table S7.** Results of significant differences in DNA repair gene expression stratified by the presence of somatic mutations. Differential expression analysis showed higher expression of several genes (*ERCC2*, *RECQL5*, *FAAP20*, *EXO1* and *PARP2*) in EOC patients with specific somatic mutations in *XPC* and *PRKDC*. Positive logFC (red color) indicates higher gene expression in EOC patients with specific potentially impactful somatic mutations compared to EOC patients without these mutations. List of the somatic mutations is summarized in the Table S6.

| <b>Somatic mutation</b> | <b>Affected gene</b> | <b>logFC</b> | <b>Adj P-value</b> |
|-------------------------|----------------------|--------------|--------------------|
| <i>XPC</i>              | <i>ERCC2</i>         | 2.01         | 0.003              |
|                         | <i>RECQL5</i>        | 2.11         | 0.010              |
|                         | <i>FAAP20</i>        | 1.82         | 0.040              |
| <i>PRKDC</i>            | <i>FAAP20</i>        | 1.90         | 0.032              |

**Table S8.** Associations of somatic mutations in DNA repair genes with *RBBP8* methylation. Positive logFC (red color) indicates a higher methylation profile in EOC patients bearing specific damaging somatic mutations compared to EOC patients bearing wild type genes.

| Somatic mutation  | Genome Change                             | Affected gene | logFC | Adj P-value              |
|-------------------|-------------------------------------------|---------------|-------|--------------------------|
| <b>Whole gene</b> |                                           |               |       |                          |
| <i>BRCA1</i>      | g.chr17:43051062C>T; g.chr17:43076608delA | <i>RBBP8</i>  | 1.56  | 2.0 x 10 <sup>-04</sup>  |
| <i>RAD9A</i>      | g.chr11:67395816G>A; g.chr11:67392196G>A  | <i>RBBP8</i>  | 1.33  | 0.013                    |
| <b>TSS200</b>     |                                           |               |       |                          |
| <i>BRCA1</i>      | g.chr17:43051062C>T; g.chr17:43076608delA | <i>RBBP8</i>  | 1.91  | 3.0 x 10 <sup>-04</sup>  |
| <i>RAD9A</i>      | g.chr11:67395816G>A; g.chr11:67392196G>A  | <i>RBBP8</i>  | 1.90  | 4.0 x 10 <sup>-04</sup>  |
| <b>TSS1500</b>    |                                           |               |       |                          |
| <i>BRCA1</i>      | g.chr17:43051062C>T; g.chr17:43076608delA | <i>RBBP8</i>  | 1.63  | 8.17 x 10 <sup>-05</sup> |
| <i>RAD9A</i>      | g.chr11:67395816G>A; g.chr11:67392196G>A  | <i>RBBP8</i>  | 1.40  | 5.0 x 10 <sup>-04</sup>  |
| <b>Promoter</b>   |                                           |               |       |                          |
| <i>BRCA1</i>      | g.chr17:43051062C>T; g.chr17:43076608delA | <i>RBBP8</i>  | 1.69  | 1.0 x 10 <sup>-04</sup>  |
| <i>RAD9A</i>      | g.chr11:67395816G>A; g.chr11:67392196G>A  | <i>RBBP8</i>  | 1.50  | 0.004                    |



**Table S9.** Top correlated DNA repair gene expression ( $P < 0.01$ ) with methylation profile

| <b>Gene</b>                                         | <b>Correlation coefficient</b> | <b>P-value</b> |
|-----------------------------------------------------|--------------------------------|----------------|
| <b><i>Whole gene methylation vs. expression</i></b> |                                |                |
| <i>BRCA1</i>                                        | -0.379                         | 0.003          |
| <i>FANCB</i>                                        | -0.342                         | 0.007          |
| <i>MSH2</i>                                         | -0.355                         | 0.005          |
| <b><i>TSS200 methylation vs. expression</i></b>     |                                |                |
| <i>ERCC1</i>                                        | 0.347                          | 0.007          |
| <i>MUTYH</i>                                        | 0.343                          | 0.007          |
| <i>PER1</i>                                         | 0.332                          | 0.01           |
| <b><i>TSS1500 methylation vs. expression</i></b>    |                                |                |
| <i>FANCG</i>                                        | -0.448                         | <0.001         |
| <i>MUTYH</i>                                        | 0.417                          | 0.001          |
| <b><i>Promoter methylation vs. expression</i></b>   |                                |                |
| <i>ALKBH2</i>                                       | 0.474                          | 0.000          |
| <i>RAD9A</i>                                        | 0.355                          | 0.005          |

## 3 Supplementary Figures

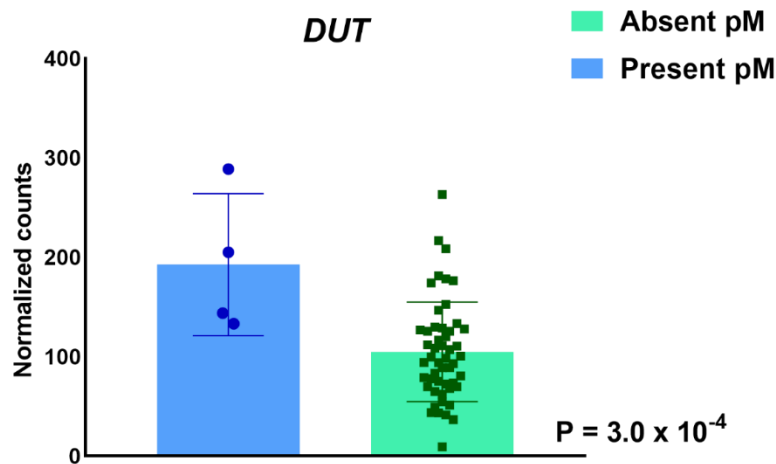

**Figure S1.** Differentially expressed gene *DUT* (deoxyuridine triphosphatase) stratified by the presence of peritoneal metastases (pM). Analysis of differential expression between patients with peritoneal metastases (N=4, blue color) or without (N=54, green color) showed significant downregulation of *DUT* gene in patients without peritoneal metastases.

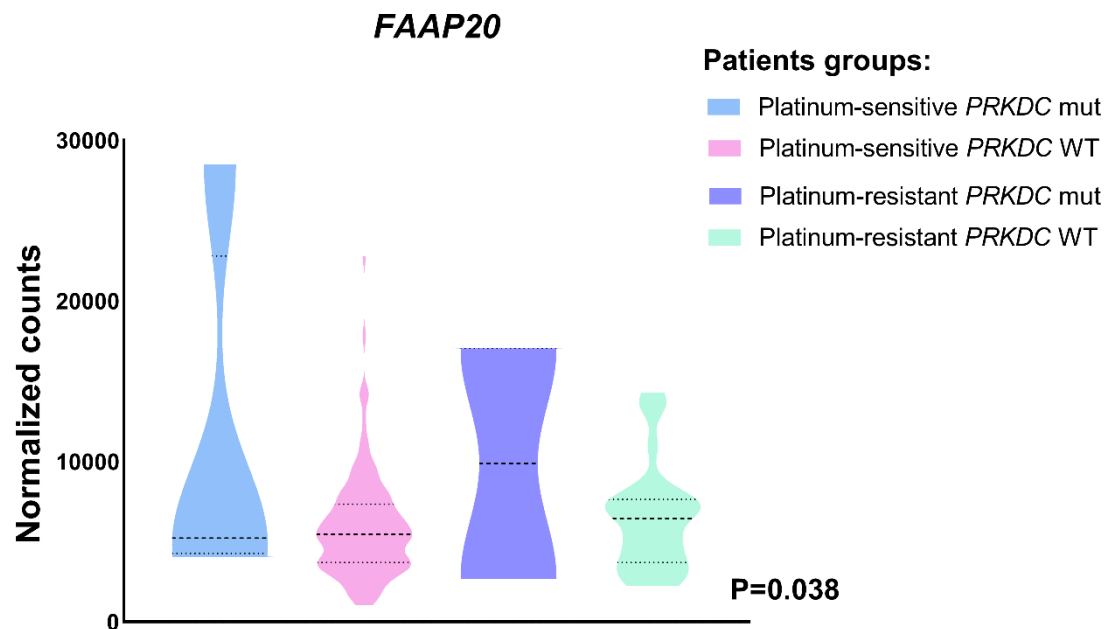

**Figure S2.** Differential *FAAP20* expression analysis stratified by the presence of somatic mutations in *PRKDC* and platinum-resistance in the TCGA dataset. We discovered a higher *FAAP20* expression in platinum-resistant patients harboring mutant *PRKDC* gene (N=2, purple color) compared to platinum-resistant ones harboring wild type *PRKDC* gene (N=29, green color) and platinum-sensitive patients harboring mutant *PRKDC* gene (N=4, blue color) or harboring wild type *PRKDC* gene (N=133, pink color).

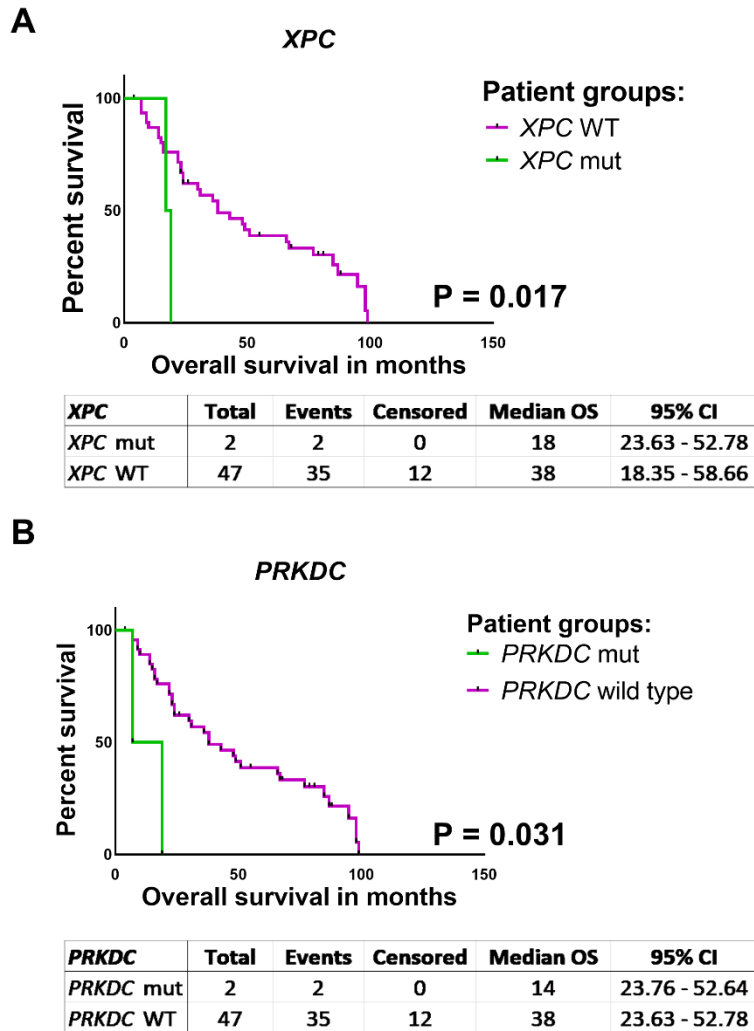

**Figure S3.** Kaplan-Meier plots of overall survival for (A) *XPC* and (B) *PRKDC* somatic mutations. Survival analysis showed significant association of *XPC* and *PRKDC* somatic mutations with overall survival of EOC patients.

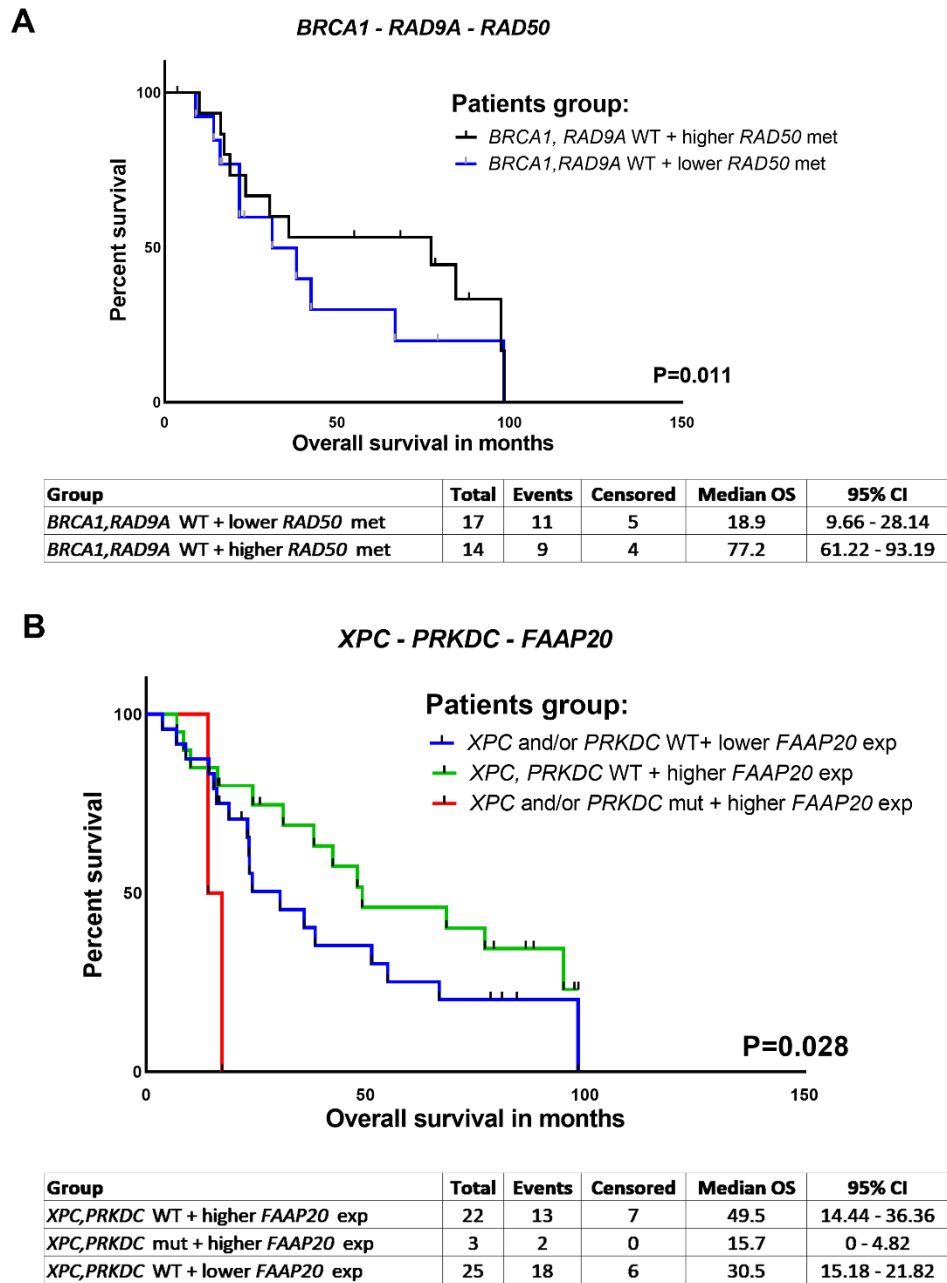

**Figure S4.** Kaplan-Meier plots of overall survival for (A) *BRCA1-RAD9A-RAD50* and (B) *XPC-PRKDC-FAAP20* combinations.
